# Supplementary material for: Network Pharmacology and Bioinformatics Identify the Potential Mechanism Underlying the Use of Hedyotis diffusa Willd for Treatment of Rheumatoid Arthritis
Source: Research Square preprint supplement (doi:10.21203/rs.3.rs-1632853/v1), 2022-05-13
Supplement: Supplementary file 1 [file 4f668552ad35fa0fe64525e8.pdf]

**Supplement Table 1.** The active components and potential targets of HDW.

| PubChem<br>CID | Active Components                     | Targets                                                                                                                                                                                                                                                                                                                                                                                                                                                                                                                                                                                                                                                                                                                                                                                                                        |
|----------------|---------------------------------------|--------------------------------------------------------------------------------------------------------------------------------------------------------------------------------------------------------------------------------------------------------------------------------------------------------------------------------------------------------------------------------------------------------------------------------------------------------------------------------------------------------------------------------------------------------------------------------------------------------------------------------------------------------------------------------------------------------------------------------------------------------------------------------------------------------------------------------|
| 5281330        | poriferasterol                        | PGR, NR3C2                                                                                                                                                                                                                                                                                                                                                                                                                                                                                                                                                                                                                                                                                                                                                                                                                     |
| 10514946       | 2-methoxy-3-methyl-9,10-anthraquinone | PTGS1, DRD1, CHRM3, CHRM1, ESR1, SCN5A, CHRM5, PTGS2, CHRM4, RXRA, OPRD1, PDE3A, HRH1, HTR2A, SLC6A2, ADRA1A, HTR2A, CHRM2, ADRA1B, SLC6A3, ADRB2, ADRA1D, SLC6A4, OPRM1, GABRA1, HSP90, PIK3CG, CHRNA7, NCOA2, PKIA                                                                                                                                                                                                                                                                                                                                                                                                                                                                                                                                                                                                           |
| 5280794        | stigmasterol                          | PGR, NR3C2, NCOA2, ADH1C, RXRA, NCOA1, PTGS1, PTGS2, ADRA2A, SLC6A2, SLC6A3, ADRB2, PLAU, LTA4H, MOB, MOA, CTRB1, CHRM3, CHRM1, ADRB1, SCN5A, ADRA1A, CHRM2, ADRA1B                                                                                                                                                                                                                                                                                                                                                                                                                                                                                                                                                                                                                                                            |
| 222284         | $\beta$ -sitosterol                   | PGR, NCOA2, PTGS1, PTGS2, KCNH2, CHRM3, CHRM1, SCN5A, CHRM4, PDE3A, ADRA1A, CHRM2, ADRA1B, ADRB2, CHRNA2, SLC6A4, OPRM1, BCL2, BAX, CASP9, CASP3, CASP8, PRKCA, TGFB1, PON1, MAP2                                                                                                                                                                                                                                                                                                                                                                                                                                                                                                                                                                                                                                              |
| 5280343        | quercetin                             | PTGS1, AR, PPARG, PTGS2, HSP90, NCOA2, TOP2, KCNH2, SCN5A, ADRB2, MMP3, F7, RXRA, ACHE, RELA, EGFR, AKT1, VEGFA, CCND1, BCL2, BCL2L1, CDKN1A, BAX, CASP9, PLAU, MMP2, MMP9, MAPK1, IL10, EGF, RB1, TNF, IL6, AHSA1, CASP3, TP53, ELK1, NFKBIA, POR, ODC1, XDH, CASP8, TOP1, RAF1, PRKCA, MMP1, HIF1A, STAT1, RUNX1T1, ERBB2, PPARG, ACACA, HMOX1, CYP3A4, CAV1, MYC, F3, GJA1, CYP1A1, ICAM1, IL1B, CCL2, SELE, VCAM1, PTGER3, PRKCB, BIRC5, DUOX2, NOS3, HSPB1, IL2, NR1I2, CYP1B1, CCNB1, PLAT, THBD, SERPINE1, IFNG, IL1A, MPO, TOP2A, NCF1, HAS2, GSTP1, NFE2L2, AHR, PSMD3, SLC2A4, CXCL11, CXCL2, DCAF5, NR1I3, CHEK2, INSR, CLDN4, PPARA, PPARD, HSF1, CRP, CXCL10, CHUK, SPP1, RUNX2, RASSF1, E2F1, E2F2, ACP3, CTSD, IGF1BP3, IGF2, CD40LG, IRF1, ERBB3, PON1, DIO1, PCOLCE, NPEPPS, HK2, NKX3-1, RASA1, GSTM1, GSTM2 |
| 5280863        | kaempferol                            | NOX4, AKR1B1, XDH, TYR, FLT3, CA2, ALOX5, CA7, HSD17B2, ABCC1, HSD17B1, AHR, CA12, ESRRA, ABCB1, CYP1B1, ABCG2                                                                                                                                                                                                                                                                                                                                                                                                                                                                                                                                                                                                                                                                                                                 |
| 5280460        | scopoletin                            | CA7, CA12, CA9                                                                                                                                                                                                                                                                                                                                                                                                                                                                                                                                                                                                                                                                                                                                                                                                                 |

---

|        |                            |                                                                         |
|--------|----------------------------|-------------------------------------------------------------------------|
| 637542 | p-Coumaric acid            | AKR1B1, CA1, CA2, CA3, CA4, CA9, CA5A, CA5B, CA6, CA7, CA12, CA14, ESR2 |
| 72     | 3, 4-Dihydroxybenzoic acid | CA2, CA7, CA1, CA6, CA12, CA14, CA9, CA4                                |
| 445858 | Ferulic acid               | CA2, CA7, CA1, CA6, CA12, CA14, CA9, CA5A,                              |
| 135    | p-Hydroxybenzoic acid      | CA2, CA7, CA1, CA3, CA6, CA12, CA14, CA9, CA4, CA5B, CA5A, CA13         |

---

**Supplement Table Table 2.** The list of genes contributing to the the 20 selected pathways.

| Description                                          | geneID                                                                                                                | Count |
|------------------------------------------------------|-----------------------------------------------------------------------------------------------------------------------|-------|
| AGE-RAGE signaling pathway in diabetic complications | AKT1/CCND1/BCL2/CASP3/F3/ICAM1/IL1A/IL1B/IL6/MMP2/NOS3/SERPINE1/MAPK1/RELA/CCL2/SELE/STAT1/TGFB1/THBD/TNF/VCAM1/VEGFA | 22    |
|                                                      | AKT1/CASP3/CASP8/CHUK/CXCL2/ICAM1/IL1B/IL6/CXCL10/IRF1/MMP3/MMP9/NFKBIA/MAPK1/PTGS2/RELA/CCL2/SELE/TNF/VCAM1          | 20    |
| TNF signaling pathway                                | AKT1/CCND1/CASP3/CASP8/CHUK/CXCL2/HIF1A/ICAM1/IL6/MYC/NFKBIA/PIK3CG/MAPK1/PTGS2/RELA/STAT1/TP53/VEGFA                 | 18    |
| Kaposi sarcoma-associated herpesvirus infection      | CASP3/CASP8/CHUK/CXCL2/IFNG/IL1B/IL6/CXCL10/MMP1/MMP3/MMP9/NFKBIA/MAPK1/PTGS2/RELA/CCL2/TNF                           | 17    |
| IL-17 signaling pathway                              | AKT1/CCND1/CASP3/CASP8/CHUK/EGF/IFNG/CXCL10/MYC/NFKBIA/PPARA/MAPK1/RELA/RXRA/STAT1/TNF/TP53                           | 17    |
| Hepatitis C                                          | AKT1/ALOX5/BCL2/CASP3/CASP8/CD40LG/CHUK/IFNG/IL10/NFKBIA/PIK3CG/MAPK1/RELA/STAT1/TGFB1/TNF                            | 16    |
| Toxoplasmosis                                        | AKT1/BIRC5/BCL2/CASP3/CASP8/CHUK/IL6/MMP9/MYC/NFKBIA/MAPK1/RELA/STAT1/TGFB1/TNF/TP53                                  | 16    |
| Hepatitis B                                          | AKT1/CASP3/CASP8/CHUK/ICAM1/IFNG/IL1A/IL1B/IL6/CXCL10/NFKBIA/MAPK1/RELA/CCL2/STAT1/TNF                                | 16    |
| Influenza A                                          | AKT1/CCND1/CASP3/CASP8/CHUK/IL1B/IL6/MYC/NFKBIA/MAPK1/PTGS2/RELA/CCL2/TNF/TP53/VEGFA                                  | 16    |
| Human cytomegalovirus infection                      | AKT1/CCND1/BCL2/CHUK/EGF/IL2/IL6/MYC/NOS3/PIK3CG/MAPK1/RELA/RXRA/SPP1/TP53/VEGFA                                      | 16    |
| PI3K-Akt signaling pathway                           | AKT1/BCL2/CASP3/CASP8/CTSD/IFNG/IL1A/IL1B/IL6/IL10/MAPK1/RELA/STAT1/TGFB1/TNF                                         | 15    |
| Tuberculosis                                         | AKT1/CCND1/BCL2/CASP3/CASP8/CHUK/ICAM1/IL6/CXCL10/MYC/NFKBIA/RELA/STAT1/TNF/TP53                                      | 15    |
| Epstein-Barr virus infection                         | AKT1/CCND1/CASP3/CAV1/ESR1/HIF1A/MMP2/MMP9/MYC/PLAU/MAPK1/TGFB1/TNF/TP53/VEGFA                                        | 15    |
| Proteoglycans in cancer                              |                                                                                                                       |       |

---

|                                          |                                                                                 |    |
|------------------------------------------|---------------------------------------------------------------------------------|----|
| Human papillomavirus infection           | AKT1/CCND1/CASP3/CASP8/CHUK/EGF/IRF1/MAPK1/PTGS2/RELA/SPP1/STAT1/TNF/TP53/VEGFA | 15 |
| Prostate cancer                          | AKT1/AR/CCND1/BCL2/CHUK/EGF/GSTP1/MMP3/MMP9/NFKBIA/PLAU/MAPK1/RELA/TP53         | 14 |
| C-type lectin receptor signaling pathway | AKT1/CASP8/CHUK/IL1B/IL2/IL6/IL10/IRF1/NFKBIA/MAPK1/PTGS2/RELA/STAT1/TNF        | 14 |
| MicroRNAs in cancer                      | CCND1/BCL2/CASP3/CYP1B1/HMOX1/MMP9/ABCC1/MYC/ABCB1/PLAU/MAPK1/PTGS2/TP53/VEGFA  | 14 |
| Herpes simplex virus 1 infection         | AKT1/BCL2/CASP3/CASP8/CHUK/IFNG/IL1B/IL6/NFKBIA/RELA/CCL2/STAT1/TNF/TP53        | 14 |
| Toll-like receptor signaling pathway     | AKT1/CASP8/CHUK/IL1B/IL6/CXCL10/NFKBIA/MAPK1/RELA/CXCL11/SPP1/STAT1/TNF         | 13 |
| Th17 cell differentiation                | AHR/CHUK/HIF1A/IFNG/IL1B/IL2/IL6/NFKBIA/MAPK1/RELA/RXRA/STAT1/TGFB1             | 13 |

---

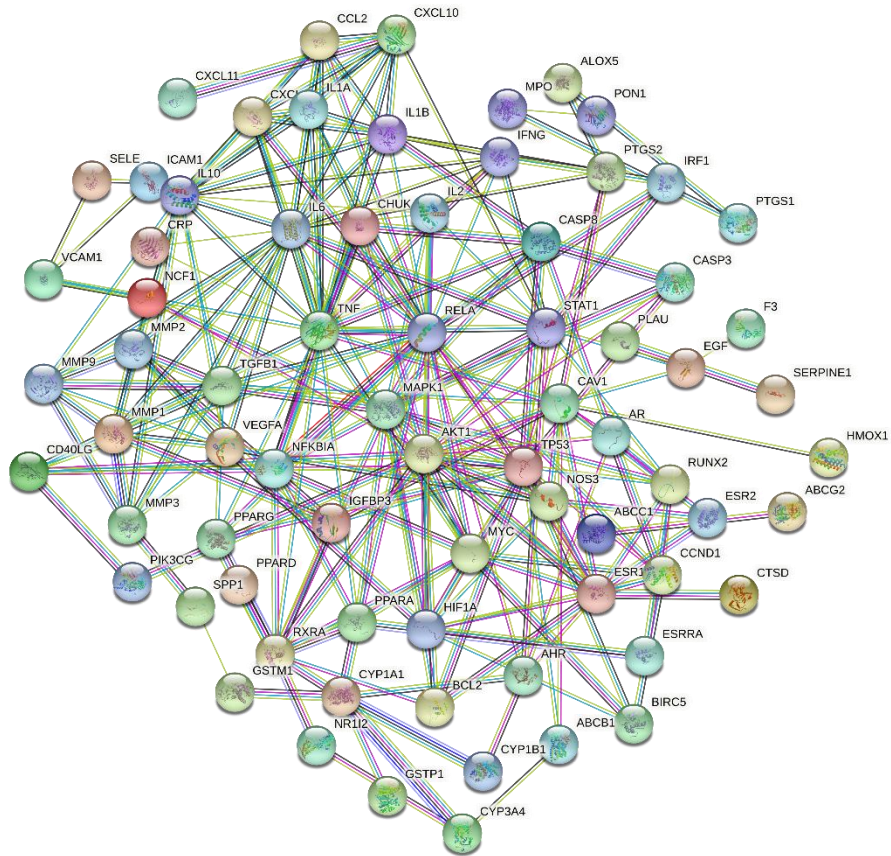

**Supplement Figure 1.** The PPI network of 85 common targets.

**Supplement Table 3.** Hub targets of HDW against RA.

| Uniprot ID | Gene Symbol | Description                               |
|------------|-------------|-------------------------------------------|
| Q04206     | RELA        | Transcription factor p65                  |
| P01375     | TNF         | Tumor necrosis factor                     |
| P05231     | IL6         | Interleukin-6                             |
| P04637     | TP53        | Cellular tumor antigen p53                |
| P28482     | MAPK1       | Mitogen-activated protein kinase 1        |
| P31749     | AKT1        | RAC-alpha serine/threonine-protein kinase |
| P22301     | IL10        | Interleukin-10                            |
| P03372     | ESR1        | Estrogen receptor                         |

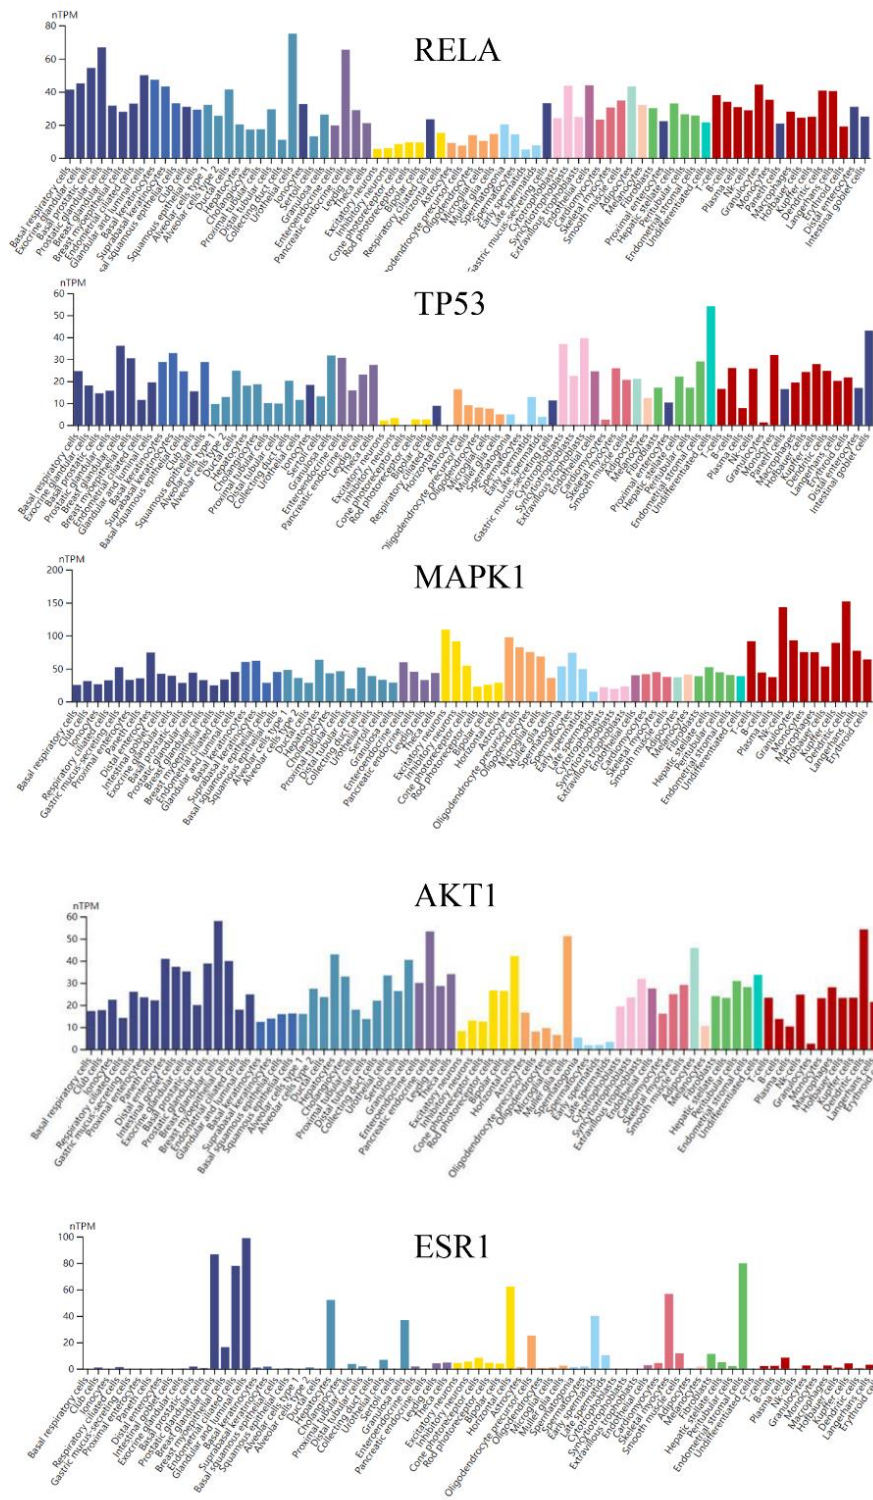

Supplement Figure 2. Expression of hub targets in different cells types.
